# Supplementary material for: Reading skills promotion: Results on the impact of a preschool intervention
Source: Frontiers journal article supplement (doi:10.3389/feduc.2022.1076630), 2023-01-09
Supplement: Data_Sheet_1.docx [file Data_Sheet_1.docx]

Supplementary Material

# Supplementary Figures and Tables

Table 1. Language and phonological awareness tasks, by time (T1/T2/T3) and group (Intervention/Comparative group).

|  | **T1** | | **T2** | | **T3** |
| --- | --- | --- | --- | --- | --- |
|  | **IG** | **CG** | **IG** | **CG** | **IG** |
| OVE | ✓ | - | ✓ | - | - |
| LC | ✓ | - | ✓ | - | - |
| RIA | ✓ | - | ✓ | - | - |
| PIA | ✓ | - | ✓ | - | - |
| PEA | ✓ | ✓ | ✓ | ✓ | ✓ |
| PS | ✓ | ✓ | ✓ | ✓ | - |

*Note:* OVE Oral Verbal Expression; LC Listening Comprehension; RIA Rime implicit awareness; PIA Phoneme implicit awareness; PEA Phoneme explicit awareness; PS Phonemic segmentation.

Table 2. Results of language and phonological awareness by time and group.

|  |  |  | Pre-Test | |  |  | Post-Test | |  |
| --- | --- | --- | --- | --- | --- | --- | --- | --- | --- |
|  |  | Intervention group  Mean (SD)  (n=242) | % | Comparative group  Mean (SD)  (n=385) | % | Intervention group  Mean (SD)  (n=242) | % | Comparative group  Mean (SD)  (n=385) | % |
| Language | OVE | 102.91 (13.72) | 69% | - |  | 109.85 (14.06) | 73% | - |  |
|  | LC | 107.92 (14.01) | 72% | - |  | 114.23 (10.07) | 76% | - |  |
| Phonological awareness | RIA | 7.73 (3.81) | 64% | - |  | 10.54 (2.30) | 88% | - |  |
| PIA | 11.46 (3.35) | 57% | - |  | 16.44 (3.27) | 82% | - |  |
| PEA | 1.27 (3.12) | 10% | 1.33 (3.56) | 11% | 9.70 (3.26) | 81% | 5.81 (4.24) | 48% |
| PS | .32 (1.03) | 6% | .23 (.87) | 5% | 2.69 (1.94) | 54% | 1.56 (1.83) | 31% |

*Note:* RIA Rime implicit awareness; PIA Phoneme implicit awareness; PEA Phoneme explicit awareness; Phonemic segmentation; RIA=12; PIA=20; PEA =12; PS maximum value =5; OVE e LC standardized values mean=100.

Graph 1. Results of PEA - Phoneme explicit awareness and PS - Phonemic segmentation by time and group.
